# Supplementary material for: Oregano Feed Supplementation Affects Glycoconjugates Production in Swine Gut
Source: PubMed Central journal article supplement (PMC7023309; doi:10.3390/ani10010149), 2020-01-16
Supplement: animals-10-00149-s001.pdf [file animals-10-00149-s001.pdf]

# Oregano feed supplementation affects glycoconjugates production in swine gut

Francesca Mercati, Cecilia Dall'Aglio, Gabriele Acuti, Valerio Faeti, Federico Maria Tardella, Carolina Pirino, Elena De Felice, Paola Scocco

## Material and methods

### *Extraction and analysis of oregano aqueous extract (OAE)*

The OAE was obtained by a process of bio-liquefaction based on enzyme bio-catalysis [1] as previously described by Franciosini et al. [2]. Briefly, the plant material was boiled in water, and treated with a specific enzymatic preparation after cooling for four hours, and finally filtered. The OAE obtained was analyzed to quantify

- antioxidant capacity, measured in terms of radical scavenging ability using the stable radical DPPH [3],
- total polyphenols, evaluated using the Folin-Ciocalteu reagent [4],
- reducing sugars was evaluated using the ADNS method [5].

**Table S1.** Feed chemical analysis in the three-phase feeding program

| Component (%) | Phase 1<br>(from 30 to 90 Kg) | Phase 2<br>(from 90 to 120 Kg) | Phase 3<br>(from 120 to 180 Kg) |
|---------------|-------------------------------|--------------------------------|---------------------------------|
| Dry matter    | 86.816                        | 86.518                         | 86.856                          |
| Crude Protein | 15.537                        | 14.366                         | 14.081                          |
| Crude Fat     | 1.634                         | 1.618                          | 2.703                           |
| Fiber         | 3.366                         | 3.252                          | 3.112                           |
| Ash           | 4.633                         | 4.422                          | 4.891                           |
| Starch        | 49.435                        | 50.547                         | 52.067                          |

**Table S2.** Sugar moieties visualized by performed histochemical treatments

| HISTOCHEMICAL TREATMENTS | SUGAR MOIETIES VISUALISED                                                                                                                                                                |
|--------------------------|------------------------------------------------------------------------------------------------------------------------------------------------------------------------------------------|
| AB pH2.5                 | Acidic groups: Sialic acid (SA), carboxylated (Hyaluronic acid, Chondroitin) and sulphated (Chondroitin-sulphates A/B/C, Heparin, Heparansulphate) Glycosaminoglycan (GAG)-like material |
| Sial-AB                  | Acidic groups without C <sub>4</sub> not acetylated SA                                                                                                                                   |
| KOH-Sial-AB              | Asialilated acidic groups (GAG-like material)                                                                                                                                            |
| AB pH1                   | Sulphated GAG-like material (Chondroitin-sulphates A/B/C, Heparin, Heparansulphate)                                                                                                      |
| AB pH0.5                 | Highly sulphated GAG-like material (Heparin, Heparansulphate)                                                                                                                            |
| PAS                      | Vicinal hydroxyls (neutral and sialilated glycoproteins, GAG-like material)                                                                                                              |
| AB/PAS                   | Acidic groups and vicinal hydroxyls                                                                                                                                                      |
| LID                      | Acidic groups                                                                                                                                                                            |
| HID                      | Sulphated GAG-like material                                                                                                                                                              |

AB = Alcian blue; Sial = sialidase; PAS = periodic acid Schiff; LID = low iron diamine; HID = high iron diamine

**Table S3.** Animal performances

| GROWTH PERFORMANCE                                   | CTR DIET | EXP DIET | <i>p</i> |
|------------------------------------------------------|----------|----------|----------|
| Mean Body weight at beginning of Finisher stage (Kg) | 120.2    | 119.8    | n.s.     |
| Mean Body weight at ending of Finisher stage (Kg)    | 183.9    | 184.2    | n.s.     |
| Average Daily Gain (g)                               | 729      | 748      | n.s.     |
| Feed Conversion Efficiency                           | 4.05     | 3.85     | n.s.     |

CTR: degermed corn-barley-soybean-based. EXP: CTR diet supplemented (2 g/kg) with an oregano aqueous extract. *P* < 0.05; n.s.: not significant

**Table S4.** Absolute P values of histochemical response difference in pig duodenum secretory structures

| PIG DUODENUM            |   | <i>p</i>     |                 |
|-------------------------|---|--------------|-----------------|
| Histochemical treatment |   | Goblet cells | Duodenal glands |
| AB pH2.5                |   | 0.01116      | 1               |
| Sial-AB                 |   | 0.9336       | -               |
| KOH-Sial-AB             |   | 0.01066      | -               |
| AB pH1                  |   | 0.01471      | -               |
| AB pH0.5                |   | 0.01066      | -               |
| PAS                     | a | 0.8294       | -               |
|                         | b | 0.1425       | -               |
| AB/PAS                  | a | 0.007937     | 1               |
|                         | b | 0.01167      | 1               |
| LID                     |   | 0.01066      | 1               |
| HID                     |   | 0.01018      | -               |

AB = Alcian Blue; Sial = Sialidase; PAS = Periodic Acid Schiff; LID = Low Iron Diamine; HID = High Iron Diamine. <sup>a</sup>= villus apical portion; <sup>b</sup>= villus basal portion

**Table S5.** Absolute *P* values of histochemical response difference in pig colon goblet cells

| PIG COLON                |          |
|--------------------------|----------|
| Histochemical treatments | <i>p</i> |
| AB pH2.5                 | 1        |
| Sial-AB                  | 0.01193  |
| KOH-Sial-AB              | 0.01193  |
| AB pH1                   | 0.05701  |
| AB pH0.5                 | 0.0144   |
| PAS                      | 1        |
| AB/PAS                   | 0.01167  |
| LID                      | 1        |
| HID                      | 0.01471  |

AB = Alcian Blue; Sial = Sialidase; PAS = Periodic Acid Schiff; LID = Low Iron Diamine; HID = High Iron Diamine.

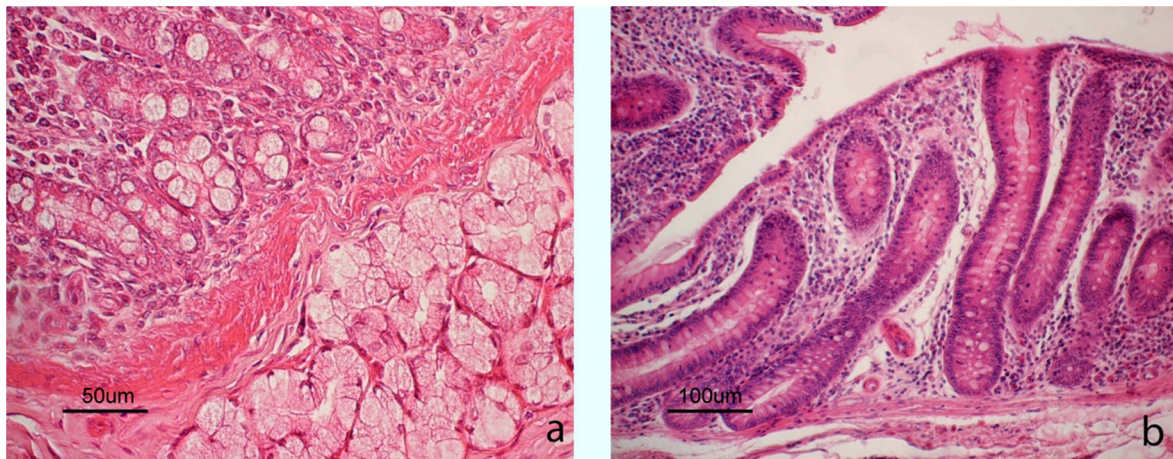

**Figure S1** Light micrograph of (a) duodenum and (b) colon. In the duodenum, glandular crypts and serous duodenal glands in the tunica submucosa are showed. In the colon, deep glandular crypts are evident. Hematoxylin-eosin staining.

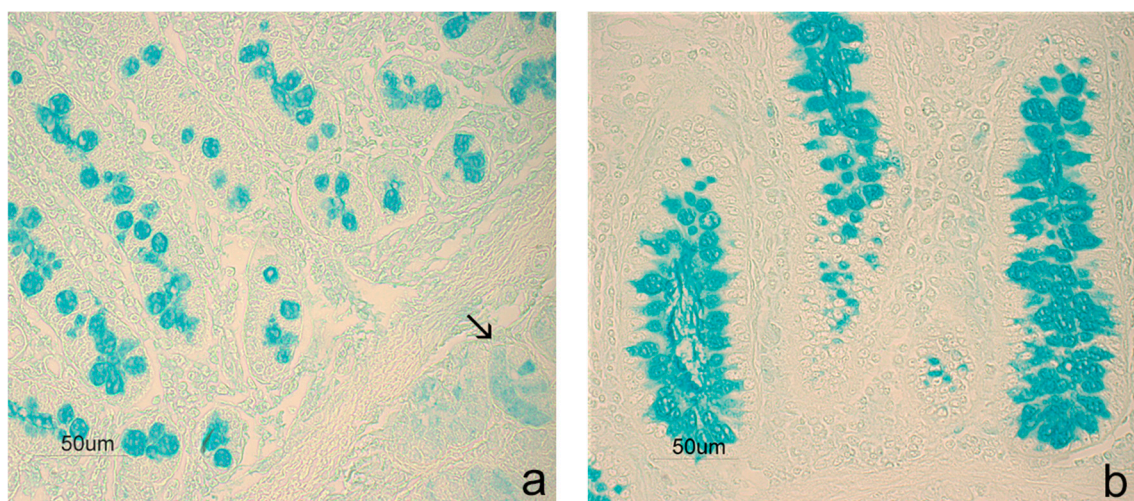

**Figure S2.** Controls for enzyme effectiveness. Sections incubated with enzyme-free buffer showed AB strong reactivity in swine duodenal goblet cells (a) and submucosal glands (↑), as well in colon goblet cells (b).

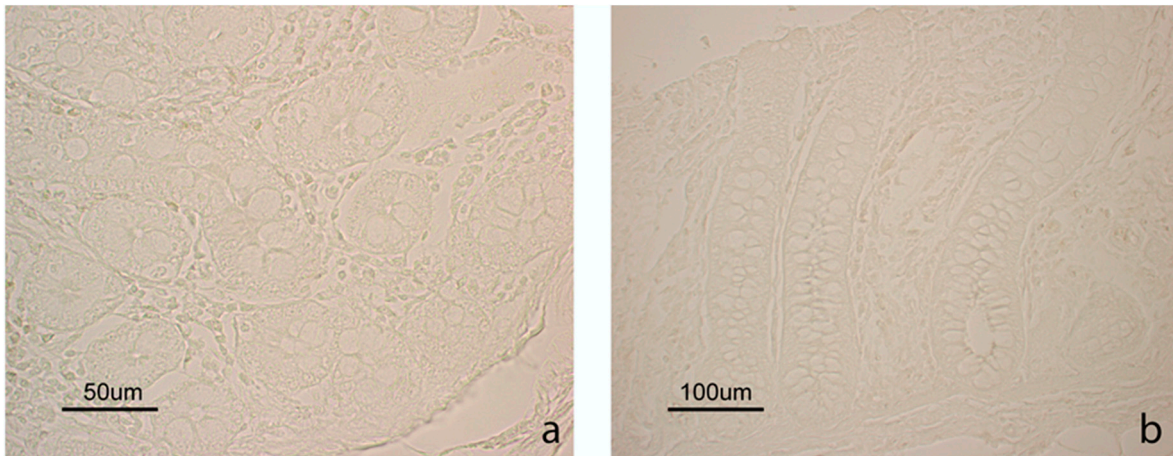

**Figure S3.** Negative controls for the BAX immunohistochemistry in swine (a) duodenum and (b) colon.

### References

1. Setti, L.; Zanichelli, D. Bioliquefaction as a bio-refinery's approach for the production of natural bioactive compounds for functional cosmetics. In: Morselli L, Passarini F, Vassura I, editors. Waste recovery: strategies, techniques and applications in Europe. Italy, Milano: Franco Angeli; **2009**, 122–128.
2. Franciosini, M.P.; Casagrande-Proietti, P.; Forte, C.; Beghelli, D.; Acuti, G.; Zanichelli, D.; Dal Bosco, A.; Castellini, C.; Tralbalza-Marinucci, M. Effects of oregano (*Origanum vulgare* L.) and rosemary (*Rosmarinus officinalis* L.) aqueous extracts on broiler performance, immune function and intestinal microbial population. *J. Appl. Anim. Res.* **2016**, *44*(1), 474–479.
3. Donglin, Z.; Yasunori, H. Phenolics, ascorbic acid, carotenoids and its antioxidant activity of broccoli and their changes during conventional and microwave cooking. *Food Chem.* **2004**, *88*, 503–509.
4. Ainsworth, E.A.; Gillespie, K.M. Estimation of total phenolics content and other oxidation substrates in plant tissues using Folin-Ciocalteu reagent. *Nat Protoc.* **2007**, *2*, 875–877.
5. Bailey, M.J.; Biely, P.; Poutanen, K. Interlaboratory testing of methods for assay of xylanase activity. *J. Biotechnol.* **1992**, *23*, 257–270.
